# Supplementary material for: Systematic characterization and fluorescence threshold strategies for the wideband integrated bioaerosol sensor (WIBS) using size-resolved biological and interfering particles
Source: Copernicus journal article supplement (doi:10.5194/amt-10-4279-2017), 2017-11-10
Supplement: Supplementary file 1 [file amt-10-4279-2017-supplement.pdf]

Supplement of Atmos. Meas. Tech., 10, 4279–4302, 2017  
<https://doi.org/10.5194/amt-10-4279-2017-supplement>  
© Author(s) 2017. This work is distributed under  
the Creative Commons Attribution 3.0 License.

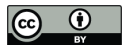

*Supplement of*

**Systematic characterization and fluorescence threshold strategies  
for the wideband integrated bioaerosol sensor (WIBS) using  
size-resolved biological and interfering particles**

Nicole J. Savage et al.

*Correspondence to:* J. Alex Huffman ([alex.huffman@du.edu](mailto:alex.huffman@du.edu)) and Nicole J. Savage ([nclsavage@gmail.com](mailto:nclsavage@gmail.com))

The copyright of individual parts of the supplement might differ from the CC BY 3.0 License.

**Table S1.** Material types analyzed, including biological and non-biological. Table includes threshold values for FT + 3 $\sigma$  and FT +9 $\sigma$ .

| Materials                   |                                                       | Provider       | Part Number | Aerosolization Method | 3 $\sigma$ FL1 | 3 $\sigma$ FL2 | 3 $\sigma$ FL3 | 9 $\sigma$ FL1 | 9 $\sigma$ FL2 | 9 $\sigma$ FL3 |
|-----------------------------|-------------------------------------------------------|----------------|-------------|-----------------------|----------------|----------------|----------------|----------------|----------------|----------------|
| <b>BIOLOGICAL MATERIALS</b> |                                                       |                |             |                       |                |                |                |                |                |                |
| <b>Pollen</b>               |                                                       |                |             |                       |                |                |                |                |                |                |
| 1                           | <i>Urtica dioica</i> (Stinging Nettle)                | BONAPOL        | -           | Powder (P1)           | 49.0           | 24.3           | 44.4           | 96.5           | 45.6           | 73.5           |
| 2                           | <i>Artemisia vulgaris</i> (Common Mugwort)            | BONAPOL        | -           | Powder (P1)           | 49.0           | 24.3           | 44.4           | 96.5           | 45.6           | 73.5           |
| 3                           | <i>Castanea sativa</i> (European Chestnut)            | BONAPOL        | -           | Powder (P1)           | 48.2           | 24.1           | 46.1           | 95.2           | 45.2           | 77.6           |
| 4                           | <i>Corylus avellana</i> (Hazel)                       | BONAPOL        | -           | Powder (P1)           | 48.2           | 24.1           | 46.1           | 95.2           | 45.2           | 77.6           |
| 5                           | <i>Taxus baccata</i> (Common Yew)                     | BONAPOL        | -           | Powder (P1)           | 48.2           | 24.1           | 46.1           | 95.2           | 45.2           | 77.6           |
| 6                           | <i>Rumex acetosella</i> (Sheep Sorrel)                | BONAPOL        | -           | Powder (P1)           | 48.2           | 24.1           | 46.1           | 95.2           | 45.2           | 77.6           |
| 7                           | <i>Olea europaea</i> (European Olive Tree)            | BONAPOL        | -           | Powder (P1)           | 48.2           | 24.1           | 46.1           | 95.2           | 45.2           | 77.6           |
| 8                           | <i>Alnus glutinosa</i> (Black Alder)                  | BONAPOL        | -           | Powder (P1)           | 50.5           | 24.9           | 48.8           | 101.2          | 46.3           | 80.9           |
| 9                           | <i>Phleum pratense</i> (Timothy Grass)                | BONAPOL        | -           | Powder (P1)           | 50.5           | 24.9           | 48.8           | 101.2          | 46.3           | 80.9           |
| 10                          | <i>Populus alba</i> (White Poplar)                    | BONAPOL        | -           | Powder (P1)           | 47.7           | 23.9           | 46.2           | 95.6           | 44.8           | 77.8           |
| 11                          | <i>Taraxacum officinale</i> (Common Dandelion)        | BONAPOL        | -           | Powder (P1)           | 47.7           | 23.9           | 46.2           | 95.6           | 44.8           | 77.8           |
| 12                          | <i>Amaranthus retroflexus</i> (Redroot Amaranth)      | BONAPOL        | -           | Powder (P1)           | 45.6           | 24.4           | 46.6           | 89.5           | 45.7           | 78.9           |
| 13                          | <i>Aesculus hippocastanum</i> (Horse-chestnut)        | BONAPOL        | -           | Powder (P1)           | 45.6           | 24.4           | 46.6           | 89.5           | 45.7           | 78.9           |
| 14                          | <i>Lycopodium</i> (Clubmoss)                          | Polysci., Inc. | 16867       | Powder (P1)           | 85.1           | 52.3           | 46.1           | 162.5          | 85.2           | 79.2           |
| <b>Fungal spores</b>        |                                                       |                |             |                       |                |                |                |                |                |                |
| 1                           | <i>Aspergillus brasiliensis</i>                       | ATCC*          | -           | Fungal                | 50.3           | 24.7           | 48.5           | 99.5           | 45.9           | 82.4           |
| 2                           | <i>Aspergillus niger</i> ; WB 326                     | ATCC           | 16888       | Fungal                | 50.3           | 24.7           | 48.5           | 99.5           | 45.9           | 82.4           |
| 3                           | <i>Rhizopus stolonifera</i> (Black Bread Mold); UNB-1 | ATCC           | 14037       | Fungal                | 50.3           | 24.7           | 48.5           | 99.5           | 45.9           | 82.4           |
| 4                           | <i>Saccharomyces cerevisiae</i> (Brewer's Yeast)      | ATCC           | -           | Fungal                | 49.0           | 24.3           | 44.5           | 96.5           | 45.6           | 73.5           |
| 5                           | <i>Aspergillus versicolor</i> ; NRRL 238              | ATCC           | 10106       | Fungal                | 49.0           | 24.3           | 44.5           | 96.5           | 45.6           | 73.5           |

| Bacteria                 |                               |            |         |             |      |      |      |       |      |       |
|--------------------------|-------------------------------|------------|---------|-------------|------|------|------|-------|------|-------|
| 1                        | <i>Bacillus atrophaeus</i>    | ATCC       | 49337   | Bacterial   | 34.1 | 18.1 | 65.8 | 70.8  | 38.1 | 103.0 |
| 2                        | <i>Escherichia coli</i>       | ATCC       | 15597   | Bacterial   | 34.1 | 18.1 | 65.8 | 70.8  | 38.1 | 103.0 |
| 3                        | <i>Pseudomonas stutzeri</i>   | ATCC       | 13525   | Bacterial   | 34.1 | 18.1 | 65.8 | 70.8  | 38.1 | 103.0 |
| Biofluorophores          |                               |            |         |             |      |      |      |       |      |       |
| 1                        | Riboflavin                    | Sigma      | R7649   | Powder (P1) | 87.3 | 56.2 | 49.1 | 166.8 | 92.4 | 84.3  |
| 2                        | Chitin                        | Sigma      | C9752   | Powder (P1) | 87.3 | 56.2 | 49.1 | 166.8 | 92.4 | 84.3  |
| 3                        | NAD                           | Sigma      | N8129   | Powder (P1) | 87.3 | 56.2 | 49.1 | 166.8 | 92.4 | 84.3  |
| 4                        | Folic Acid                    | Sigma      | F7876   | Powder (P1) | 87.3 | 56.2 | 49.1 | 166.8 | 92.4 | 84.3  |
| 5                        | Cellulose, fibrous medium     | Sigma      | 4352396 | Powder (P1) | 85.3 | 54.5 | 48.5 | 159.7 | 88.6 | 82.1  |
| 6                        | Ergosterol                    | Sigma      | 45480   | Powder (P1) | 92.8 | 48.0 | 40.5 | 176.1 | 79.7 | 68.8  |
| 7                        | Pyridoxine                    | Sigma      | P5669   | Powder (P1) | 96.7 | 46.1 | 40.6 | 186.5 | 77.7 | 69.0  |
| 8                        | Pyridoxamine                  | Sigma      | P9380   | Powder (P1) | 92.8 | 48.0 | 40.5 | 176.1 | 79.7 | 68.8  |
| 9                        | Tyrosine                      | Sigma      | 855456  | Powder (P1) | 87.1 | 52.3 | 44.8 | 166.4 | 86.8 | 75.8  |
| 10                       | Phenylalanine                 | Sigma      | 78019   | Powder (P1) | 85.3 | 54.5 | 48.5 | 159.7 | 88.6 | 82.1  |
| 11                       | Tryptophan                    | Sigma      | 93659   | Powder (P1) | 85.3 | 54.5 | 48.5 | 159.7 | 88.6 | 82.1  |
| 12                       | Histidine                     | Sigma      | H8000   | Powder (P1) | 90.9 | 45.2 | 39.3 | 173.0 | 76.8 | 66.3  |
| NON-BIOLOGICAL MATERIALS |                               |            |         |             |      |      |      |       |      |       |
| Dust                     |                               |            |         |             |      |      |      |       |      |       |
| 1                        | Arabic Sand                   | UM-SEES ** | -       | Powder (P3) | 85.1 | 52.3 | 46.1 | 162.5 | 85.2 | 79.2  |
| 2                        | California Sand               | UM-SEES    | -       | Powder (P2) | 85.1 | 52.3 | 46.1 | 162.5 | 85.2 | 79.2  |
| 3                        | Africa Sand                   | UM-SEES    | -       | Powder (P2) | 87.9 | 45.7 | 39.4 | 166.4 | 77.8 | 66.8  |
| 4                        | Murkee-Murkee Australian Sand | UM-SEES    | -       | Powder (P2) | 87.9 | 45.7 | 39.4 | 166.4 | 77.8 | 66.8  |
| 5                        | Manua Key Summit Hawaii Sand  | UM-SEES    | -       | Powder (P2) | 87.9 | 45.7 | 39.4 | 166.4 | 77.8 | 66.8  |
| 6                        | Quartz                        | UM-SEES    | -       | Powder (P2) | 87.9 | 45.7 | 39.4 | 166.4 | 77.8 | 66.8  |
| 7                        | Kakadu Dust                   | UM-SEES    | -       | Powder (P2) | 87.9 | 45.7 | 39.4 | 166.4 | 77.8 | 66.8  |

|    |                   |         |   |             |      |      |      |       |      |      |
|----|-------------------|---------|---|-------------|------|------|------|-------|------|------|
| 8  | Feldspar          | UM-SEES | - | Powder (P2) | 87.9 | 45.7 | 39.4 | 166.4 | 77.8 | 66.8 |
| 9  | Hematite          | UM-SEES | - | Powder (P2) | 87.9 | 45.7 | 39.4 | 166.4 | 77.8 | 66.8 |
| 10 | Gypsum            | UM-SEES | - | Powder (P2) | 90.9 | 45.2 | 39.3 | 173.0 | 76.8 | 66.3 |
| 11 | Bani AMMA         | UM-SEES | - | Powder (P2) | 90.9 | 45.2 | 39.3 | 173.0 | 76.8 | 66.3 |
| 12 | Arizona Test Dest | UM-SEES | - | Powder (P2) | 90.9 | 45.2 | 39.3 | 173.0 | 76.8 | 66.3 |
| 13 | Kaolinite         | Sigma   |   | Powder (P2) | 90.9 | 45.2 | 39.3 | 173.0 | 76.8 | 66.3 |

#### HULIS

|   |                                              |         |        |             |      |      |      |       |      |      |
|---|----------------------------------------------|---------|--------|-------------|------|------|------|-------|------|------|
| 1 | Waskish Peat Humic Acid Reference            | IHSS*** | 1R107H | Powder (P1) | 90.9 | 45.2 | 39.3 | 173.0 | 76.8 | 66.3 |
| 2 | Suwannee River Humic Acid Standard II        | IHSS    | 2S101H | Powder (P2) | 90.9 | 45.2 | 39.3 | 173.0 | 76.8 | 66.3 |
| 3 | Suwannee River Fulvic Acid Standard I        | IHSS    | 1S101F | Powder (P2) | 90.9 | 45.2 | 39.3 | 173.0 | 76.8 | 66.3 |
| 4 | Elliott Soil Humic Acid Standard             | IHSS    | 1S102H | Powder (P1) | 90.9 | 45.2 | 39.3 | 173.0 | 76.8 | 66.3 |
| 5 | Pony Lake (Antarctica) Fulvic Acid Reference | IHSS    | 1R109F | Powder (P2) | 90.9 | 45.2 | 39.3 | 173.0 | 76.8 | 66.3 |
| 6 | Nordic Aquatic Fulvic Acid Reference         | IHSS    | 1R105F | Powder (P2) | 90.9 | 45.2 | 39.3 | 173.0 | 76.8 | 66.3 |

#### Polycyclic Hydrocarbons

|   |              |       |        |             |      |      |      |       |      |      |
|---|--------------|-------|--------|-------------|------|------|------|-------|------|------|
| 1 | Pyrene       | Sigma | 82648  | Powder (P1) | 92.8 | 48.0 | 40.5 | 176.1 | 79.7 | 68.8 |
| 2 | Phenanthrene | Sigma | 695114 | Powder (P1) | 92.8 | 48.0 | 40.5 | 176.1 | 79.7 | 68.8 |
| 3 | Naphthalene  | Sigma | 84679  | Powder (P1) | 92.8 | 48.0 | 40.5 | 176.1 | 79.7 | 68.8 |

#### Combustion Soot and Smoke

|   |                                                       |                    |       |             |      |      |      |       |      |      |
|---|-------------------------------------------------------|--------------------|-------|-------------|------|------|------|-------|------|------|
| 1 | Aquadag                                               | Synthesized in lab | -     | Liquid      | 45.6 | 24.4 | 46.6 | 89.5  | 45.7 | 78.9 |
| 2 | Ash                                                   | MPIC               | -     | Powder (P1) | 96.7 | 46.1 | 40.6 | 186.5 | 77.7 | 69.0 |
| 3 | Fullerene Soot                                        | Alfa Aesar         | 40971 | Powder (P2) | 92.8 | 48.0 | 40.5 | 176.1 | 79.7 | 68.8 |
| 4 | Diesel Soot                                           | NIST               | 2975  | Powder (P1) | 92.8 | 48.0 | 40.5 | 176.1 | 79.7 | 68.8 |
| 5 | Cigarette Smoke                                       | Marlboro 83s       | -     | Smoke       | 50.5 | 24.9 | 48.8 | 101.2 | 46.3 | 80.9 |
| 6 | Wood Smoke ( <i>Pinus Nigra</i> , <i>Black Pine</i> ) | Local Sample       | -     | Smoke       | 50.5 | 24.9 | 48.8 | 101.2 | 46.3 | 80.9 |

|                         |                              |                    |       |             |      |      |      |       |      |       |
|-------------------------|------------------------------|--------------------|-------|-------------|------|------|------|-------|------|-------|
| 7                       | Fire Ash                     | UM-SEES            | -     | Powder (P1) | 85.1 | 52.3 | 46.1 | 162.5 | 85.2 | 79.2  |
| Brown Carbon            |                              |                    |       |             |      |      |      |       |      |       |
| 1                       | Methylglyoxal + Glycine      | Synthesized in lab | -     | Liquid      | 30.9 | 16.8 | 60.8 | 63.8  | 35.1 | 101.2 |
| 2                       | Glycolaldehyde + Methylamine | Synthesized        | -     | Liquid      | 33.5 | 17.6 | 64.0 | 69.4  | 36.1 | 108.5 |
| 3                       | Glyoxal + Ammonium Sulfate   | Synthesized        | -     | Liquid      | 31.5 | 17.2 | 64.9 | 65.2  | 34.7 | 111.7 |
| Common Household Fibers |                              |                    |       |             |      |      |      |       |      |       |
| 1                       | Laboratory wipes             | Kimberly Clark     | -     |             | 46.4 | 23.7 | 43.9 | 92.7  | 44.5 | 73.9  |
| 2                       | Cotton t-shirt (white)       | Hanes              | -     |             | 46.4 | 23.7 | 43.9 | 92.7  | 44.5 | 73.9  |
| 3                       | Cotton t-shirt (black)       | Hanes              | -     |             | 46.4 | 23.7 | 43.9 | 92.7  | 44.5 | 73.9  |
| 4                       | 2 µm Green                   | Thermo-Sci.        | G0200 | Liquid      | -    | -    | -    | -     | -    | -     |
| 5                       | 2 µm Red                     | Thermo-Sci.        | R0200 | Liquid      | -    | -    | -    | -     | -    | -     |
| 6                       | 2.1 µm Blue                  | Thermo-Sci.        | B0200 | Liquid      | -    | -    | -    | -     | -    | -     |

\*ATCC: American Type Culture Collection

\*\* University of Manchester – School of Earth and Environmental Sciences

\*\*\* International Humic Substance Society

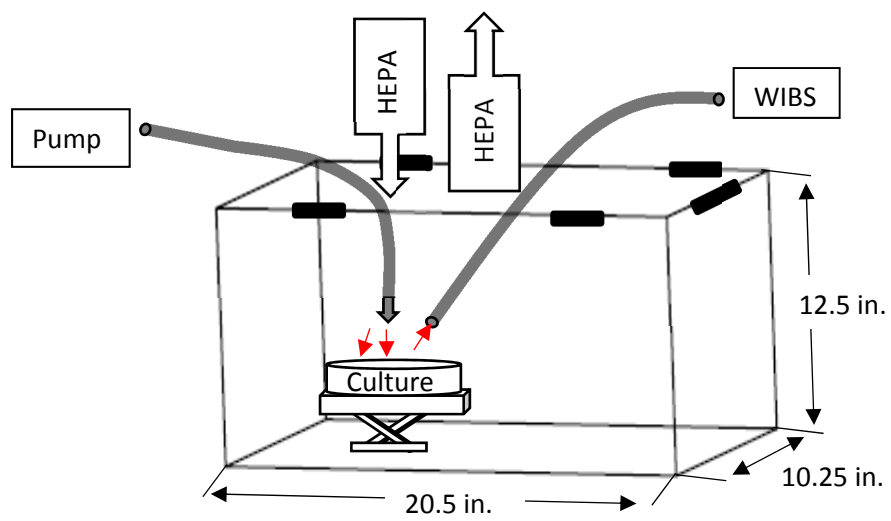

Figure S1. Schematic diagram of home-built chamber for the aerosolization of fungal spores.

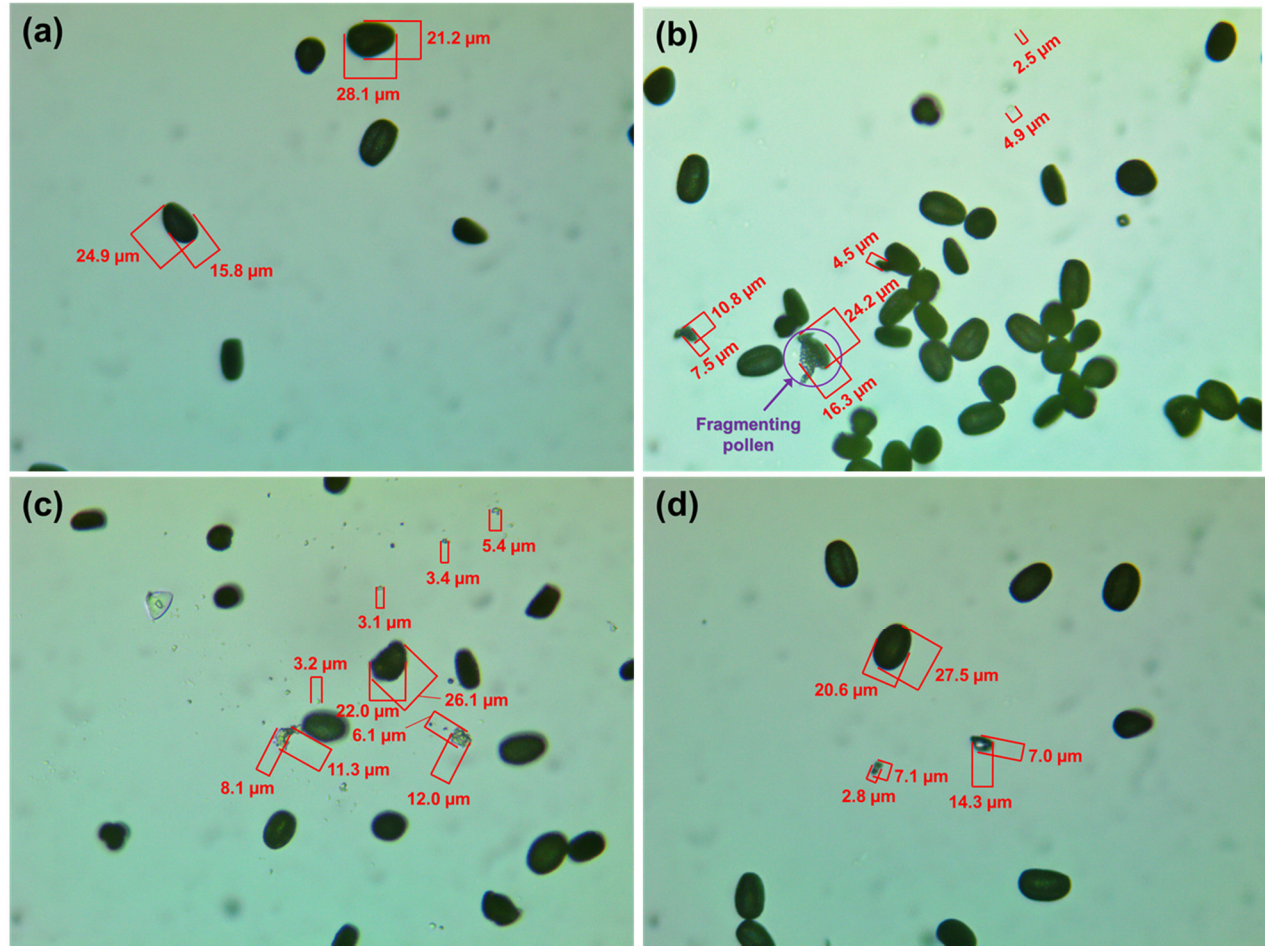

Figure S2. Impacted pollen (*Olea europaea*) images collected with an AmScope camera (MU800, AmScope) with an objective lens with 40x magnification. (a) Not stirred (b-d) Stirred. Example of rupturing pollen grain shown in (b).

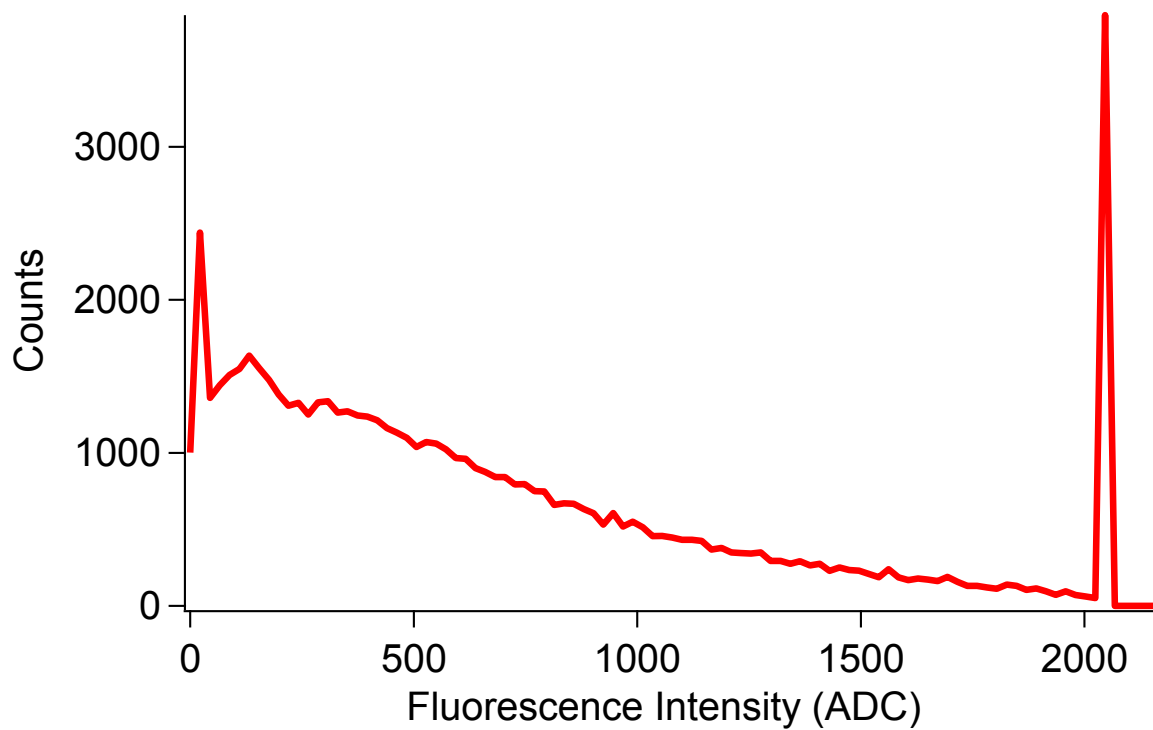

Figure S3. Fluorescence intensity histogram of FL1 for *Aspergillus niger* (Fungi 2). One broad mode extending from 0-2000 analog-to-digital counts (ADC) and a second mode showing detector saturation at ~2047 ADC.



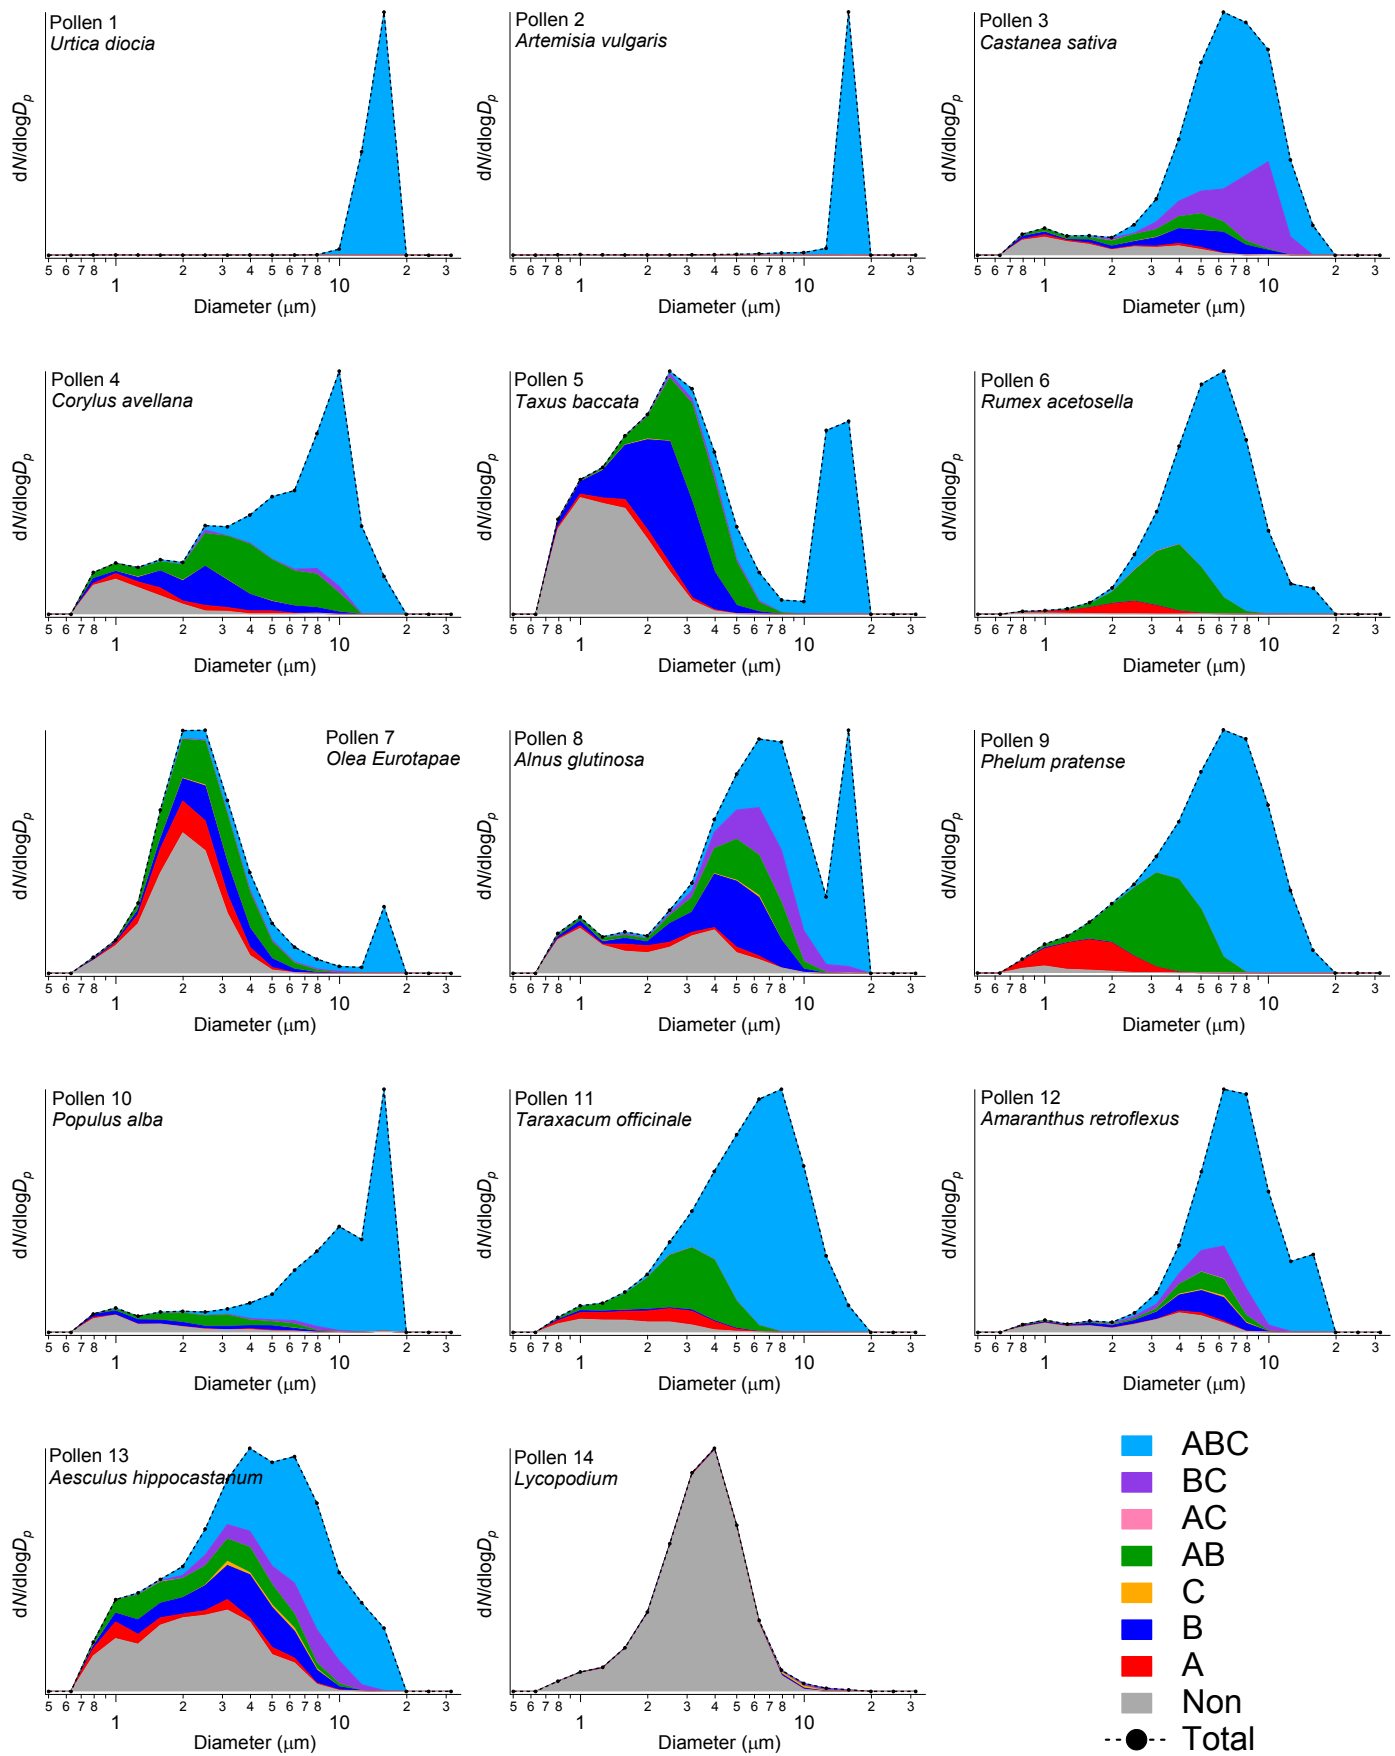

Figure S4A. Stacked particle type size distributions of pollen using FT +  $3\sigma$  threshold

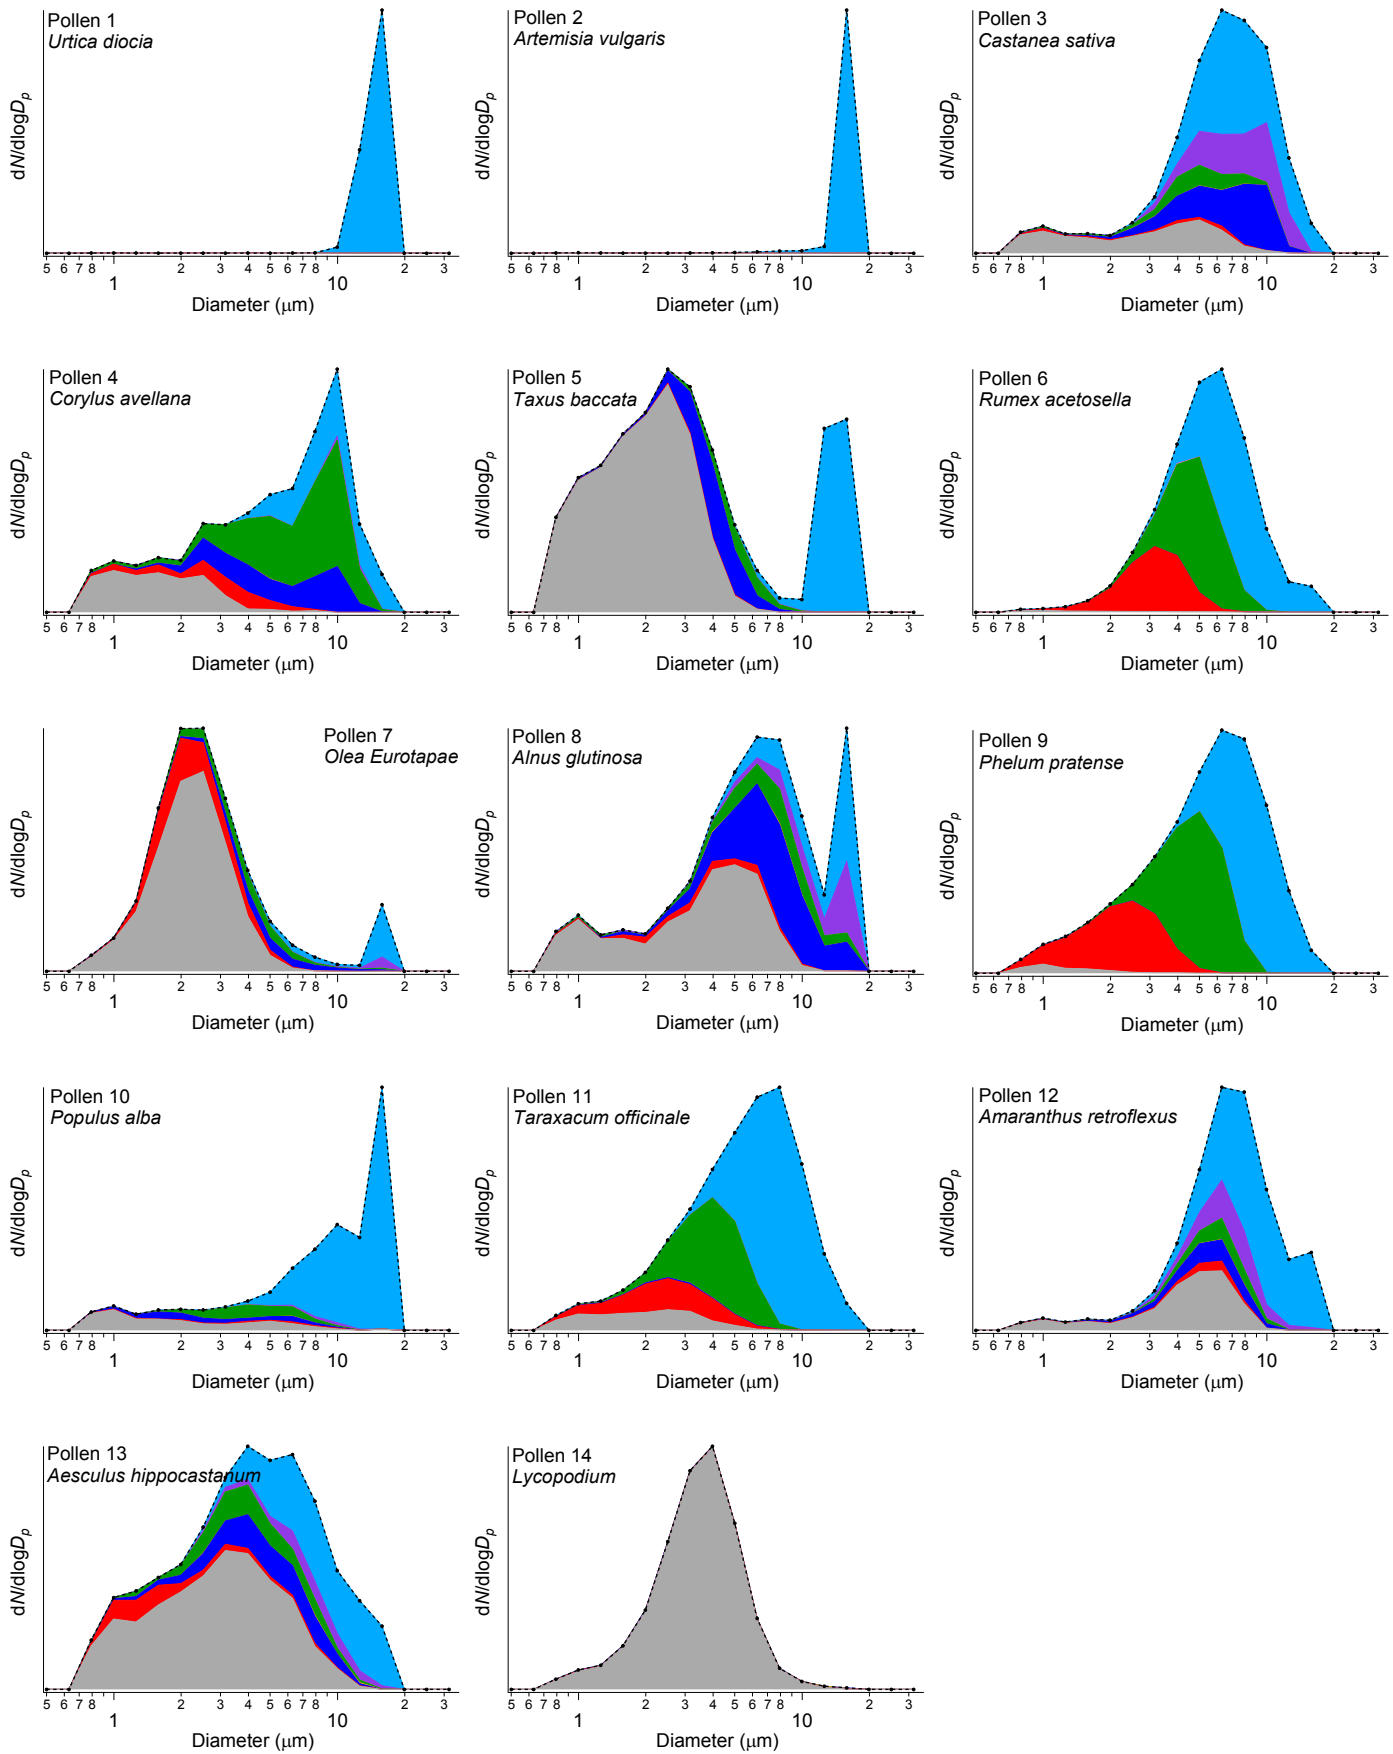

**Figure S4B.** Stacked particle type size distributions of pollen using FT +  $9\sigma$  threshold

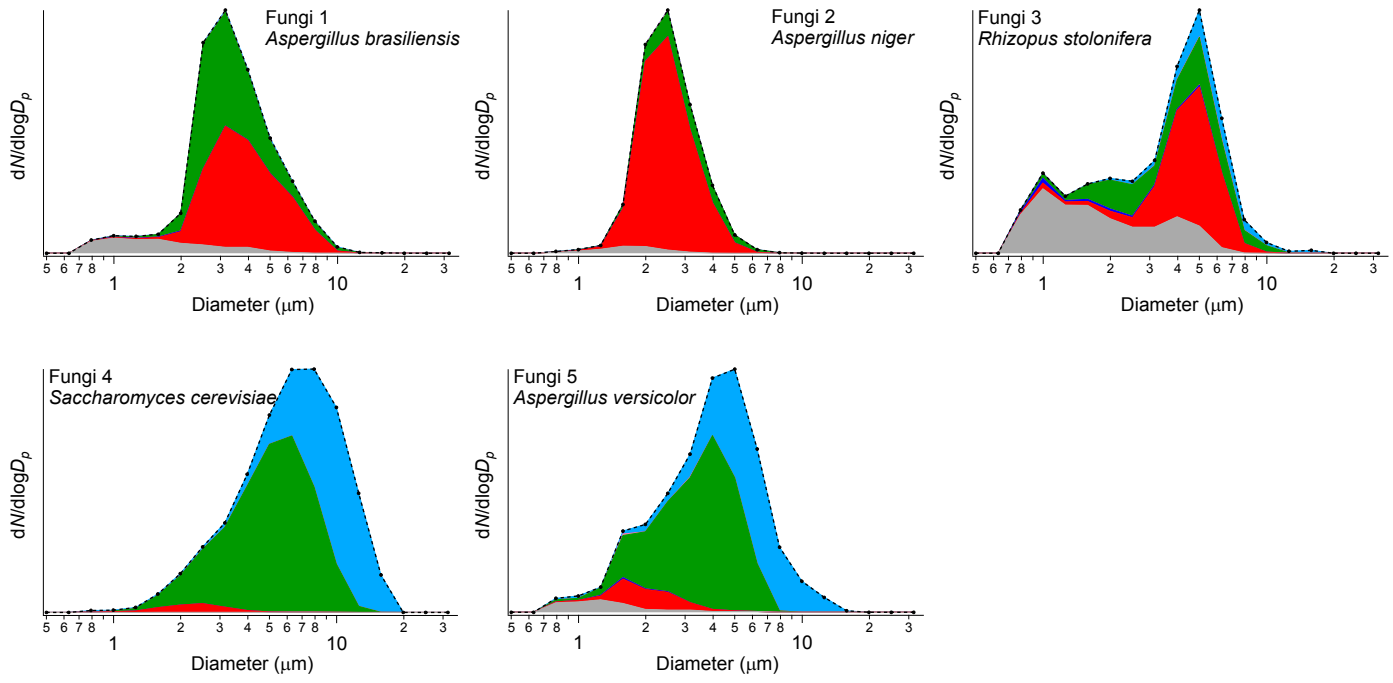

**Figure S4C.** Stacked particle type size distributions of fungal spores using  $FT + 3\sigma$  threshold

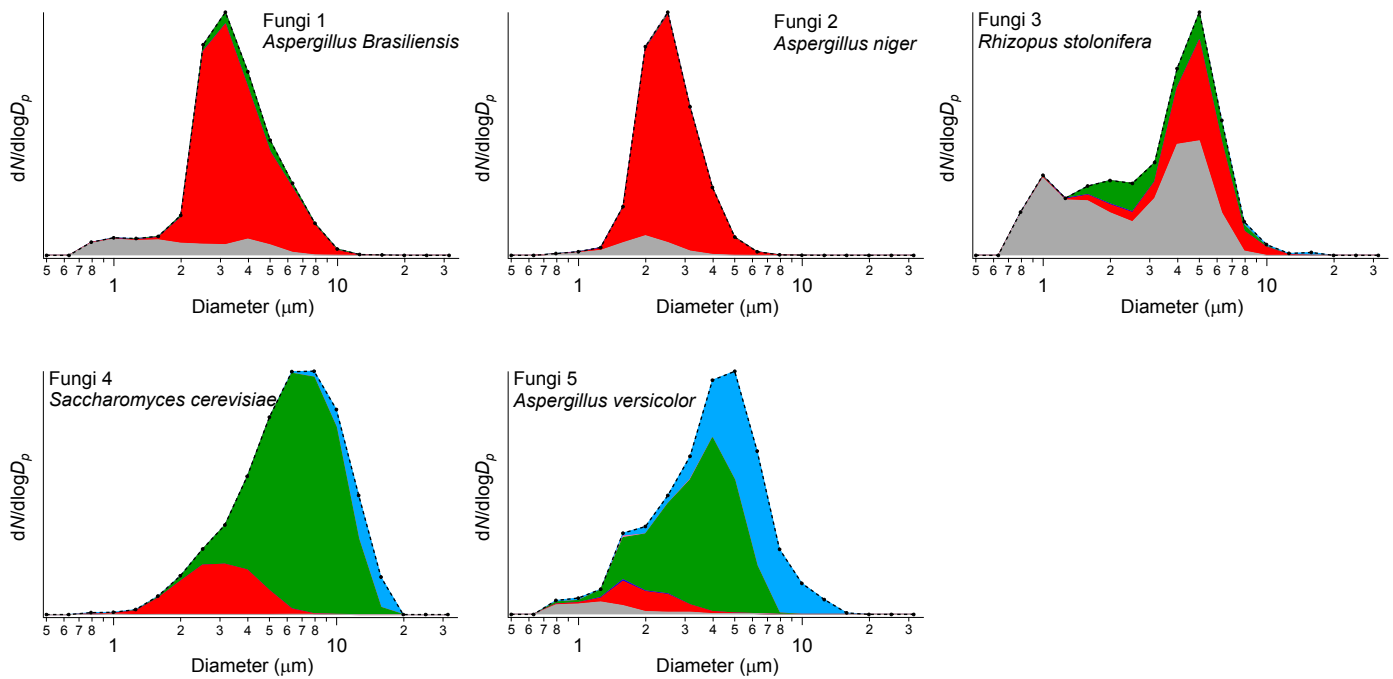

**Figure S4D.** Stacked particle type size distributions of fungal spores using  $FT + 9\sigma$  threshold

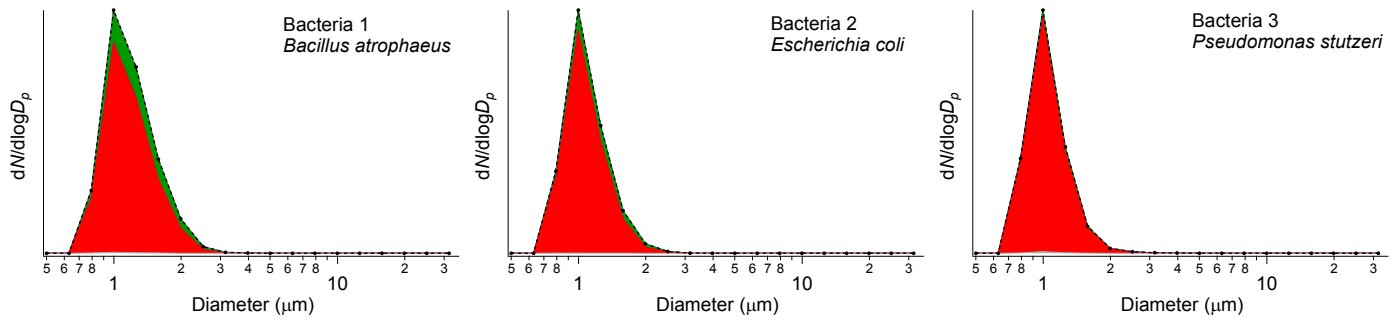

Figure S4E. Stacked particle type size distributions of bacteria using  $FT + 3\sigma$  threshold

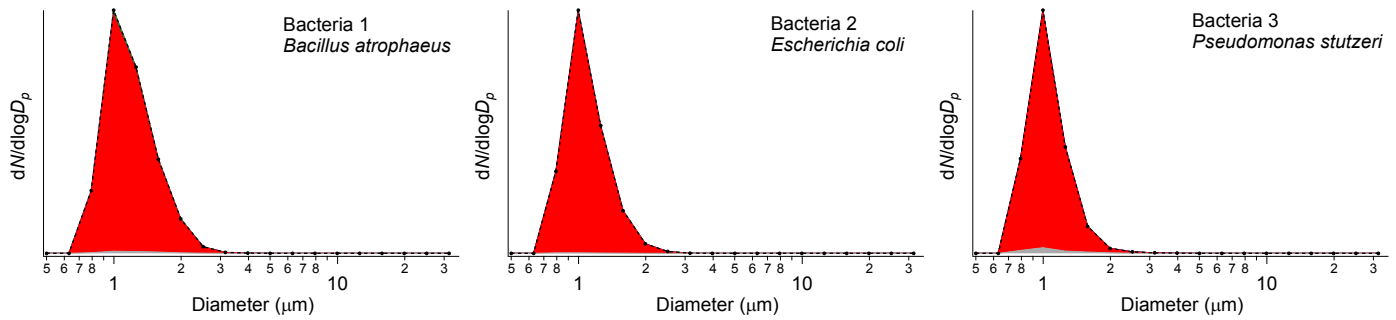

Figure S4F. Stacked particle type size distributions of bacteria using  $FT + 9\sigma$  threshold

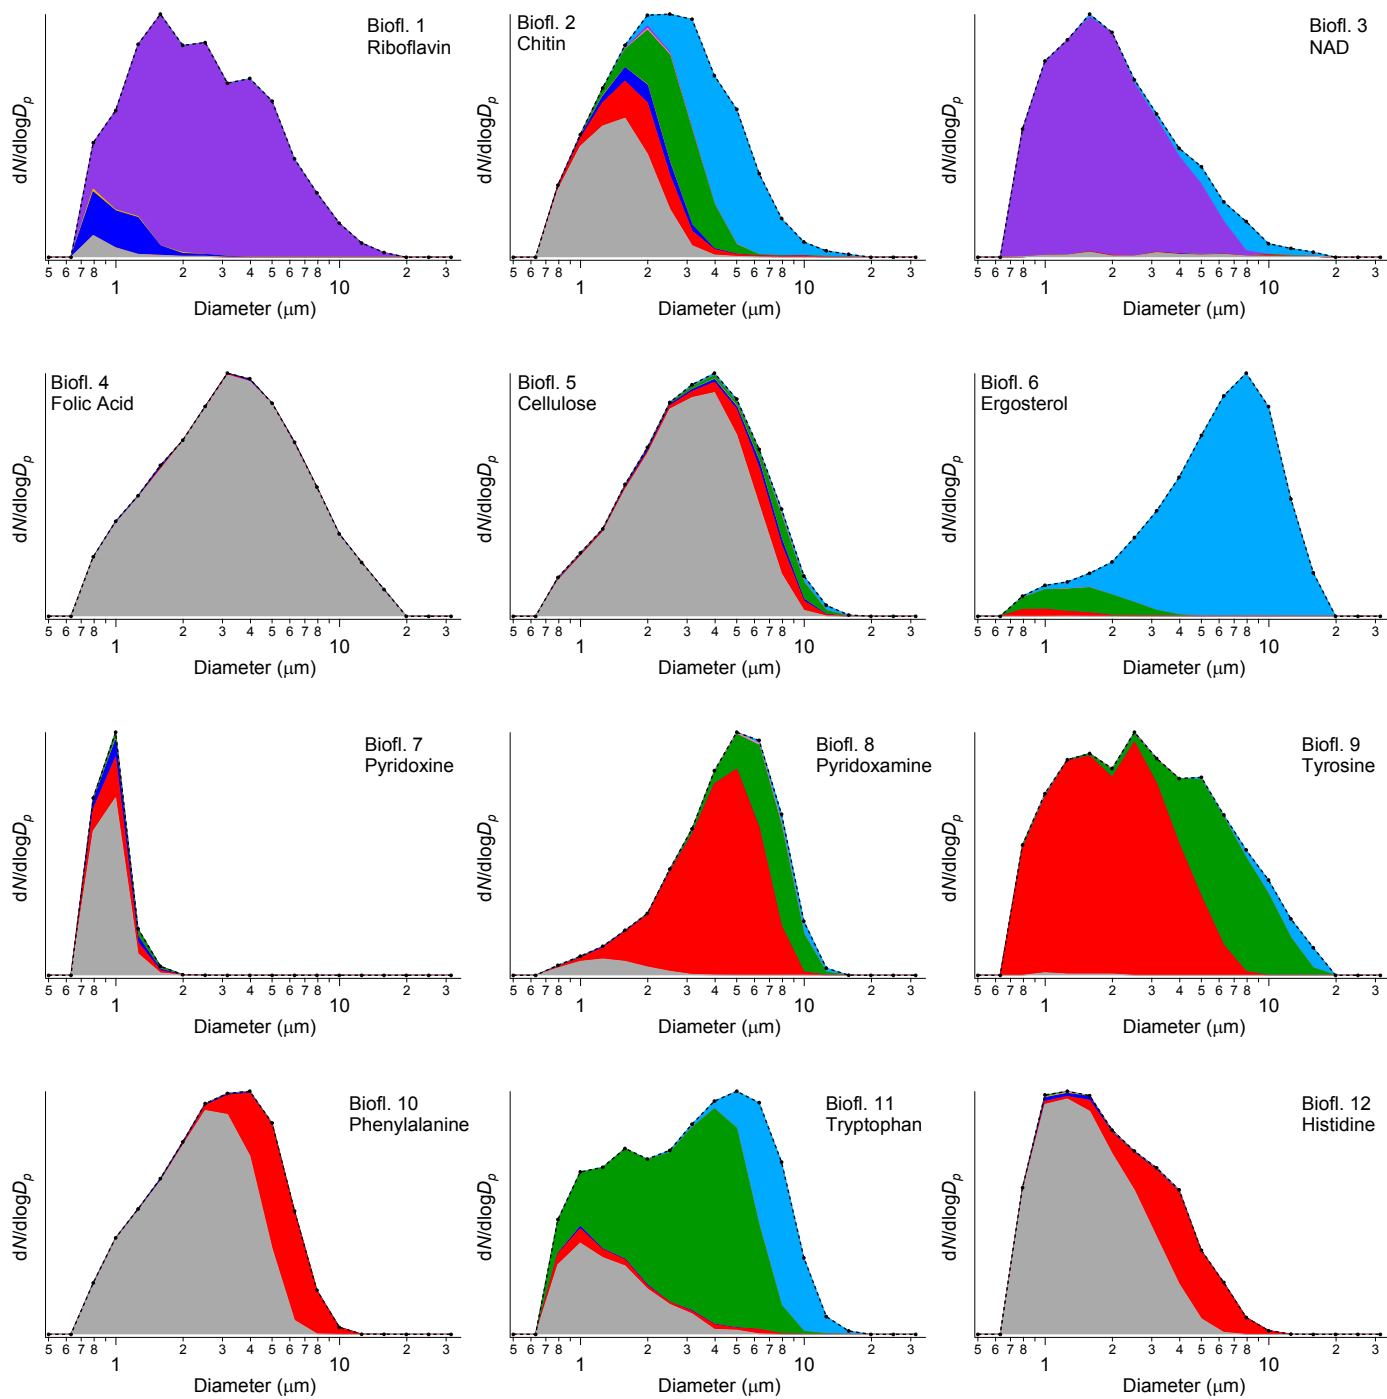

Figure S4G. Stacked particle type size distributions of biofluorophores using FT + 3σ threshold

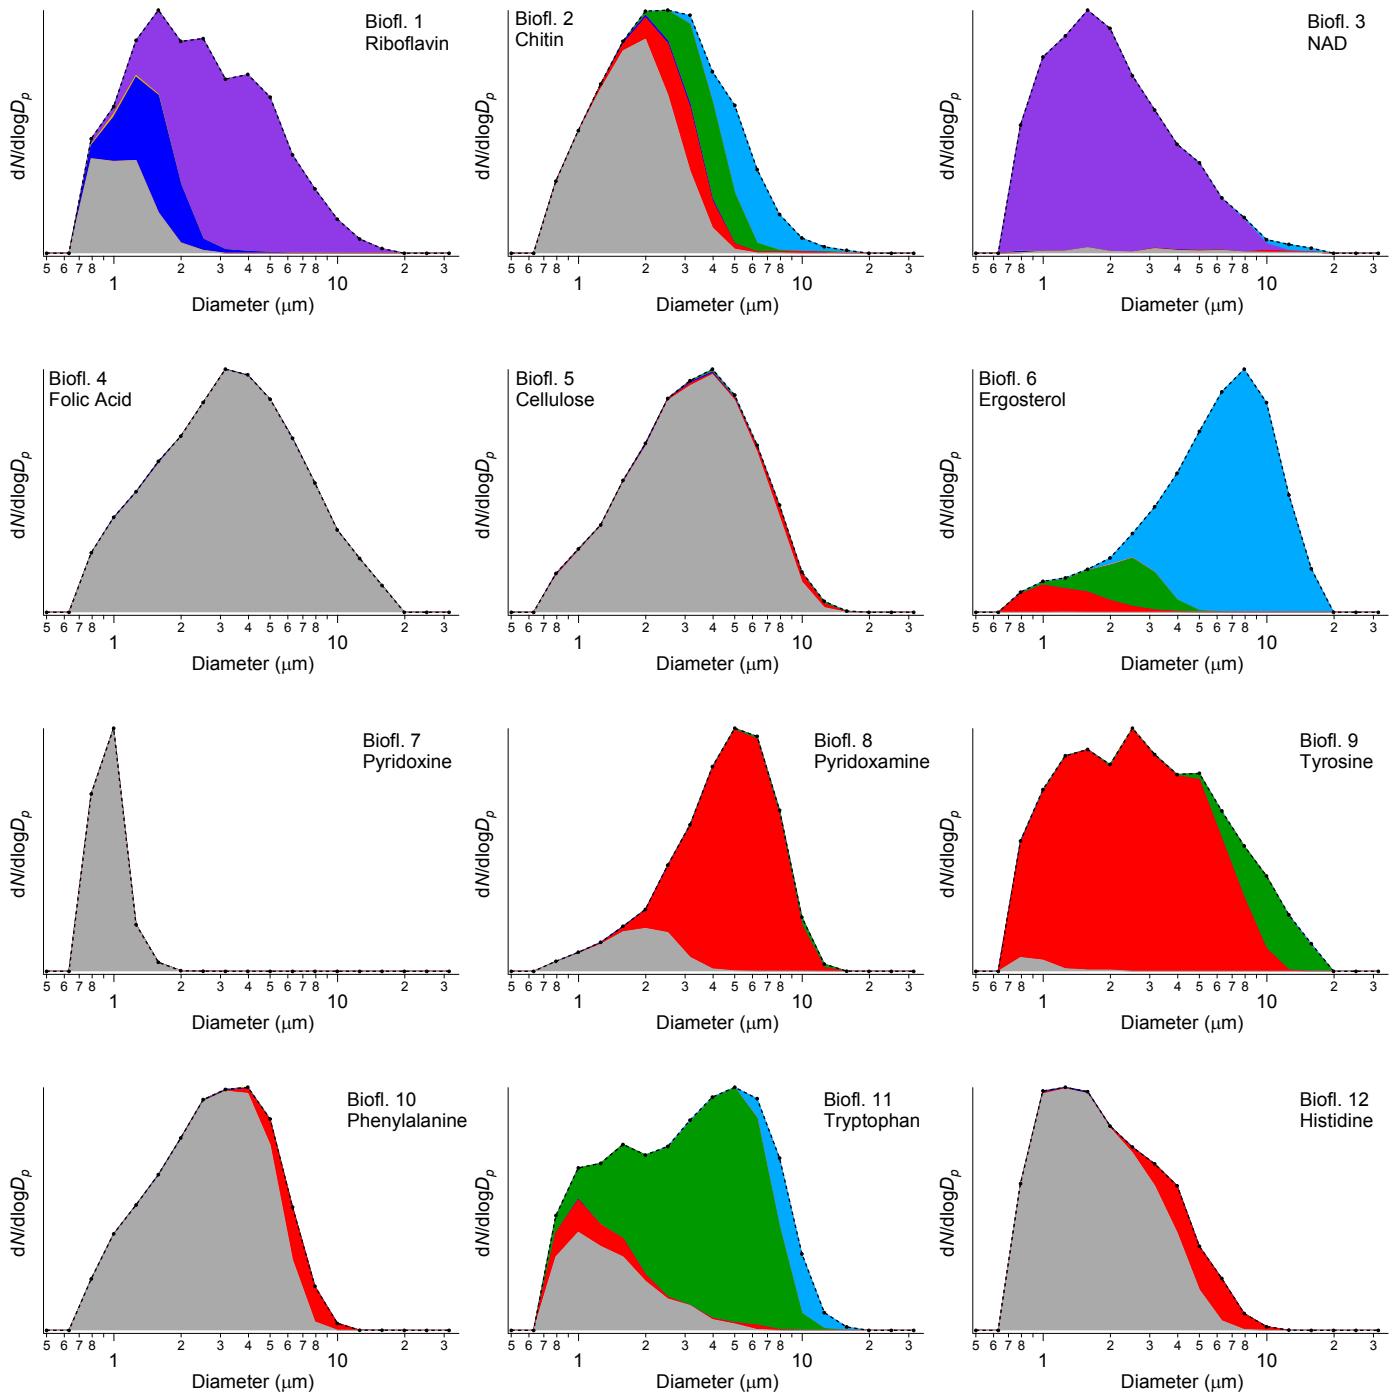

**Figure S4H.** Stacked particle type size distributions of biofluorophores using FT + 9σ threshold

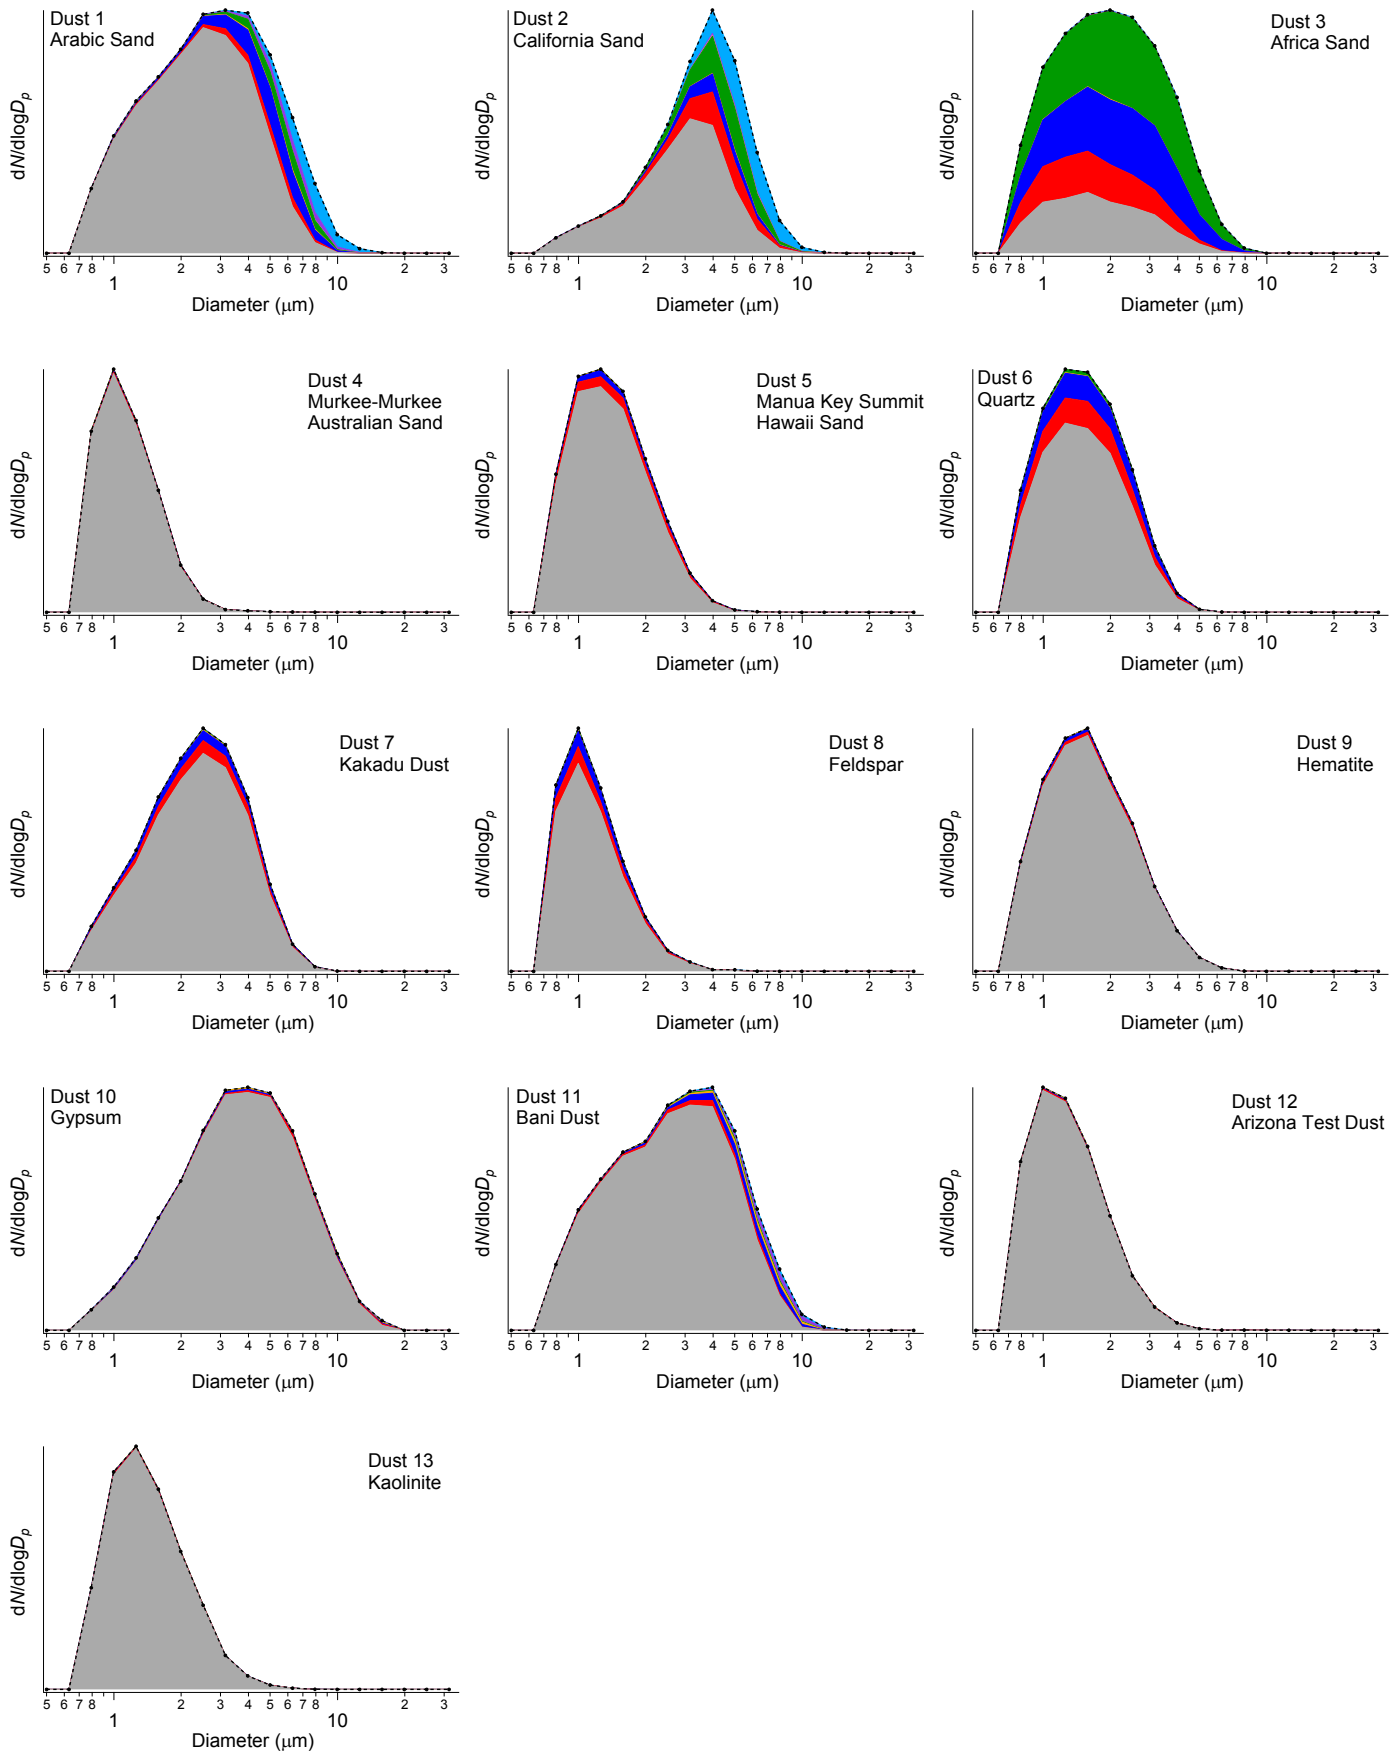

Figure S4I. Stacked particle type size distributions of dust using  $FT + 3\sigma$  threshold

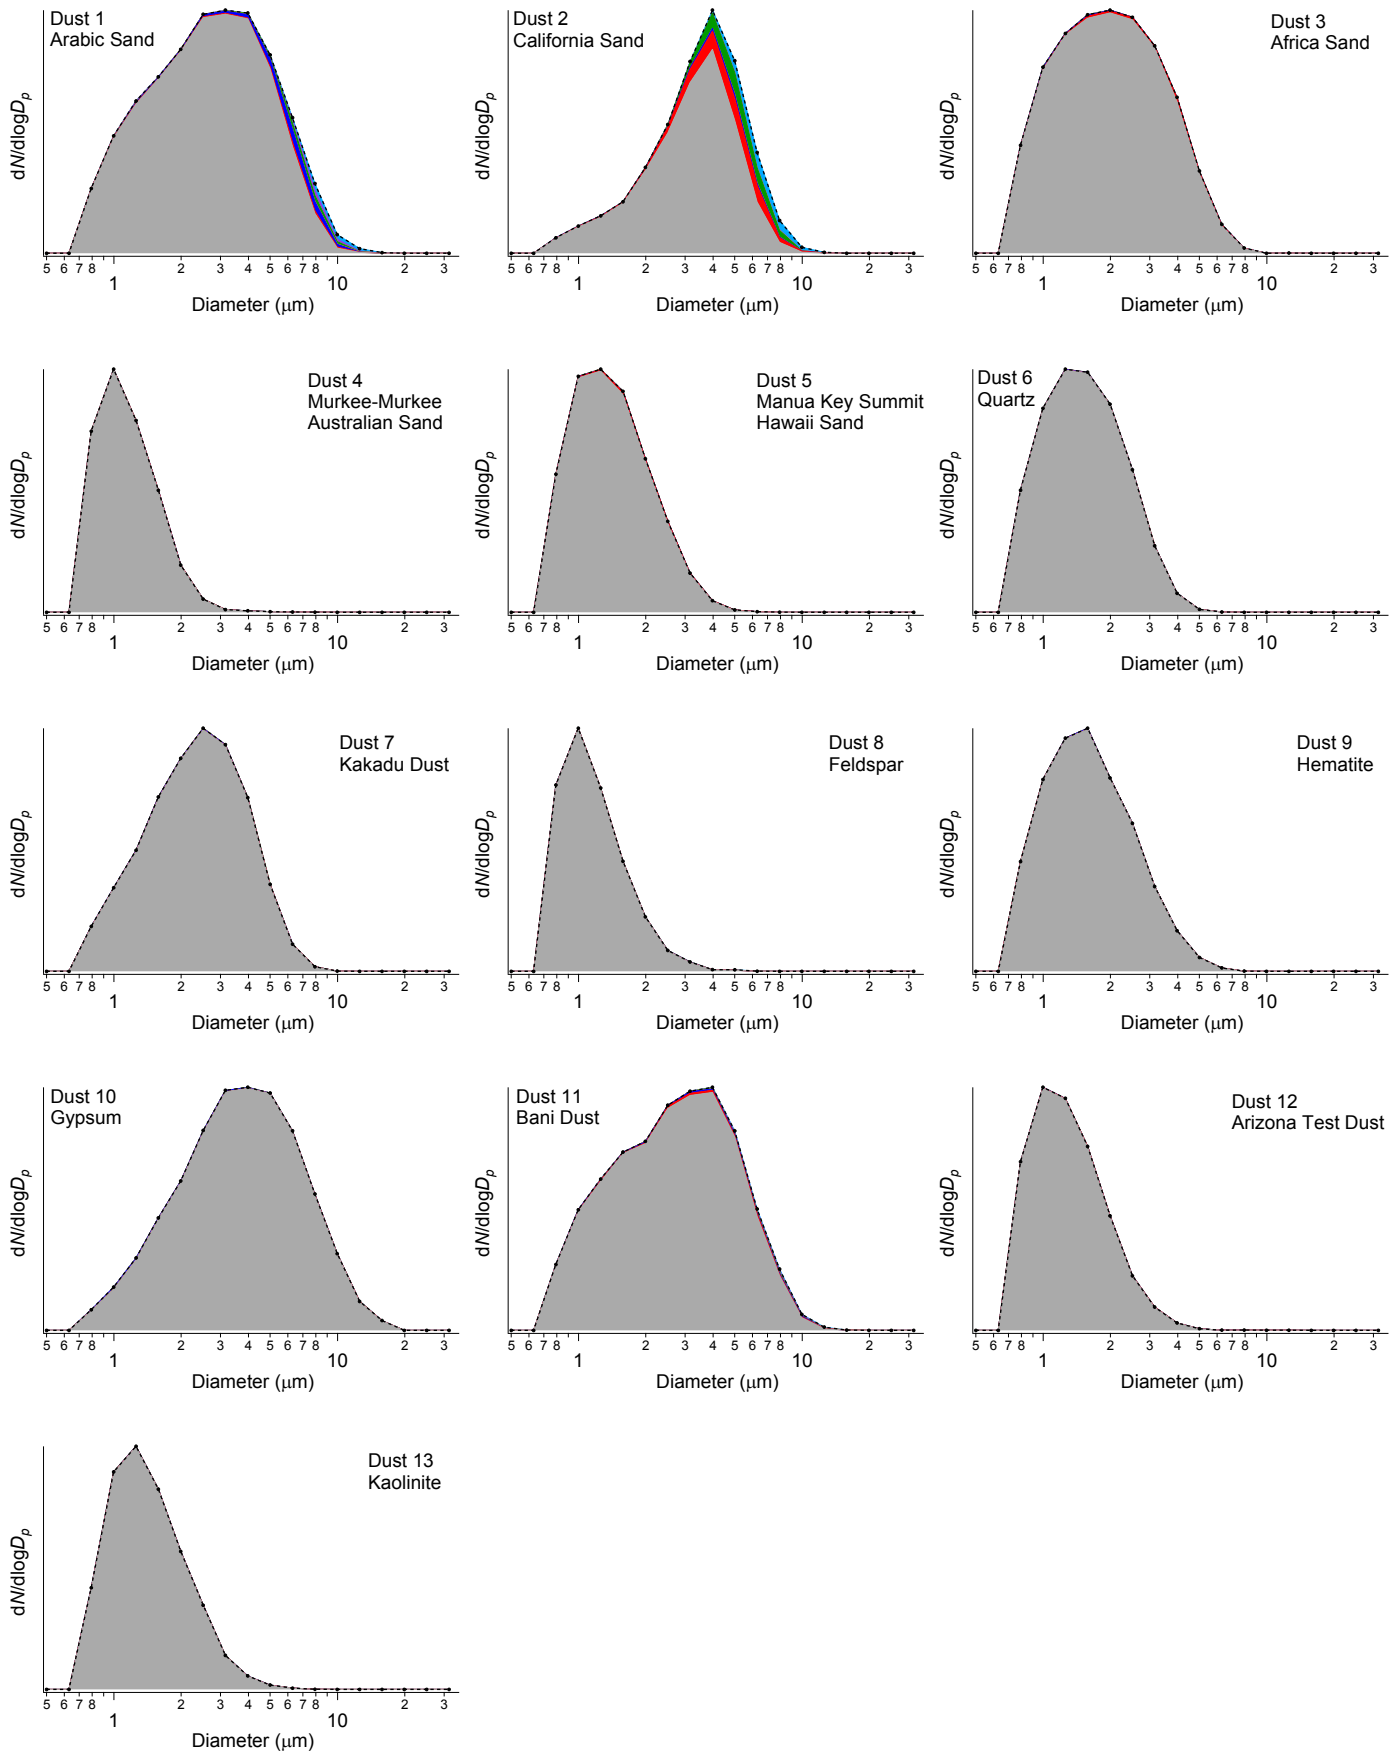

Figure S4J. Stacked particle type size distributions of dust using FT + 9σ threshold



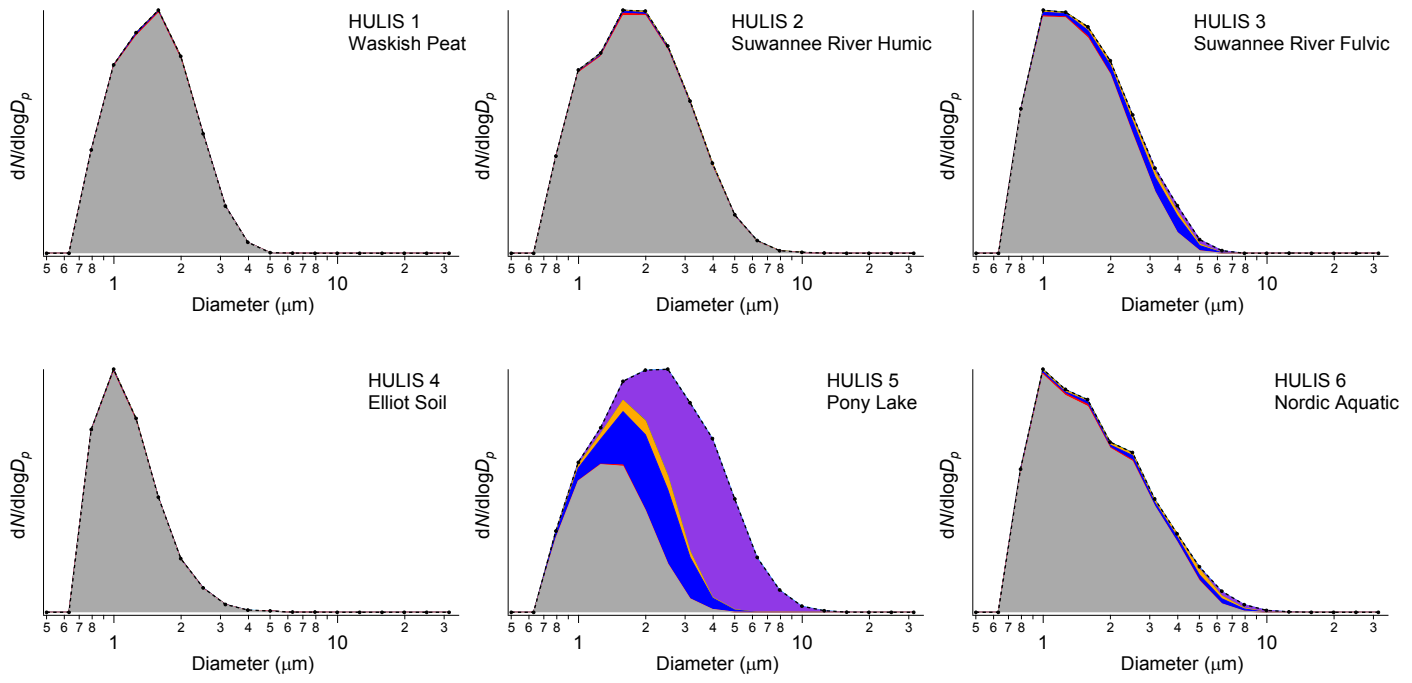

**Figure S4K.** Stacked particle type size distributions of HULIS using FT + 3σ threshold

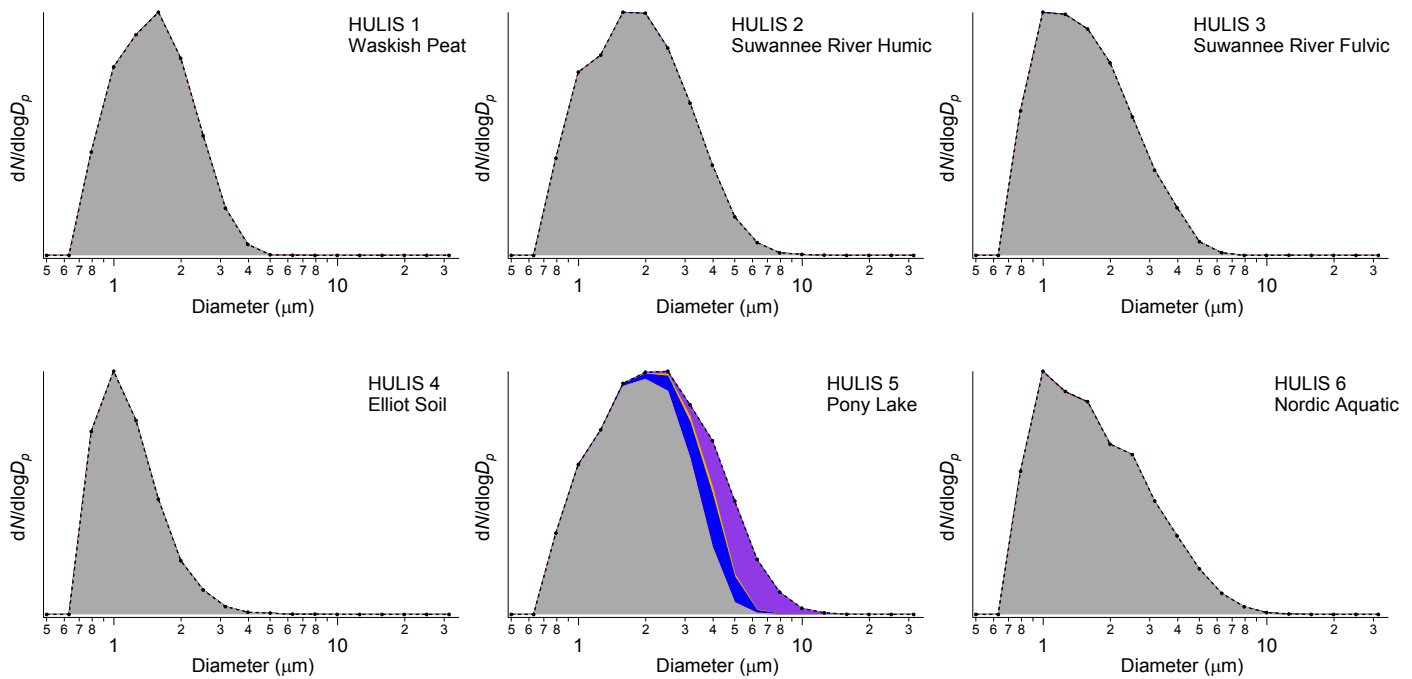

**Figure S4L.** Stacked particle type size distributions of HULIS using FT + 9σ threshold

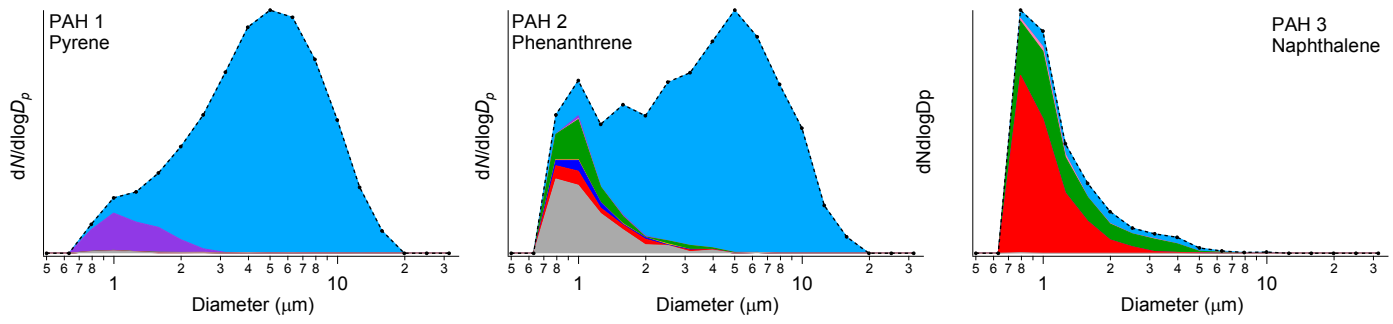

**Figure S4M.** Stacked particle type size distributions of PAHs using  $FT + 3\sigma$  threshold

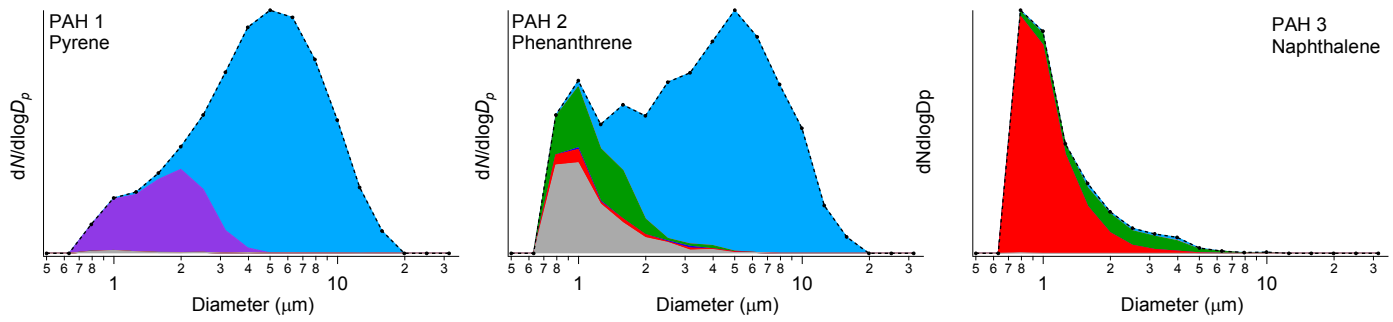

**Figure S4N.** Stacked particle type size distributions of PAHs using  $FT + 9\sigma$  threshold

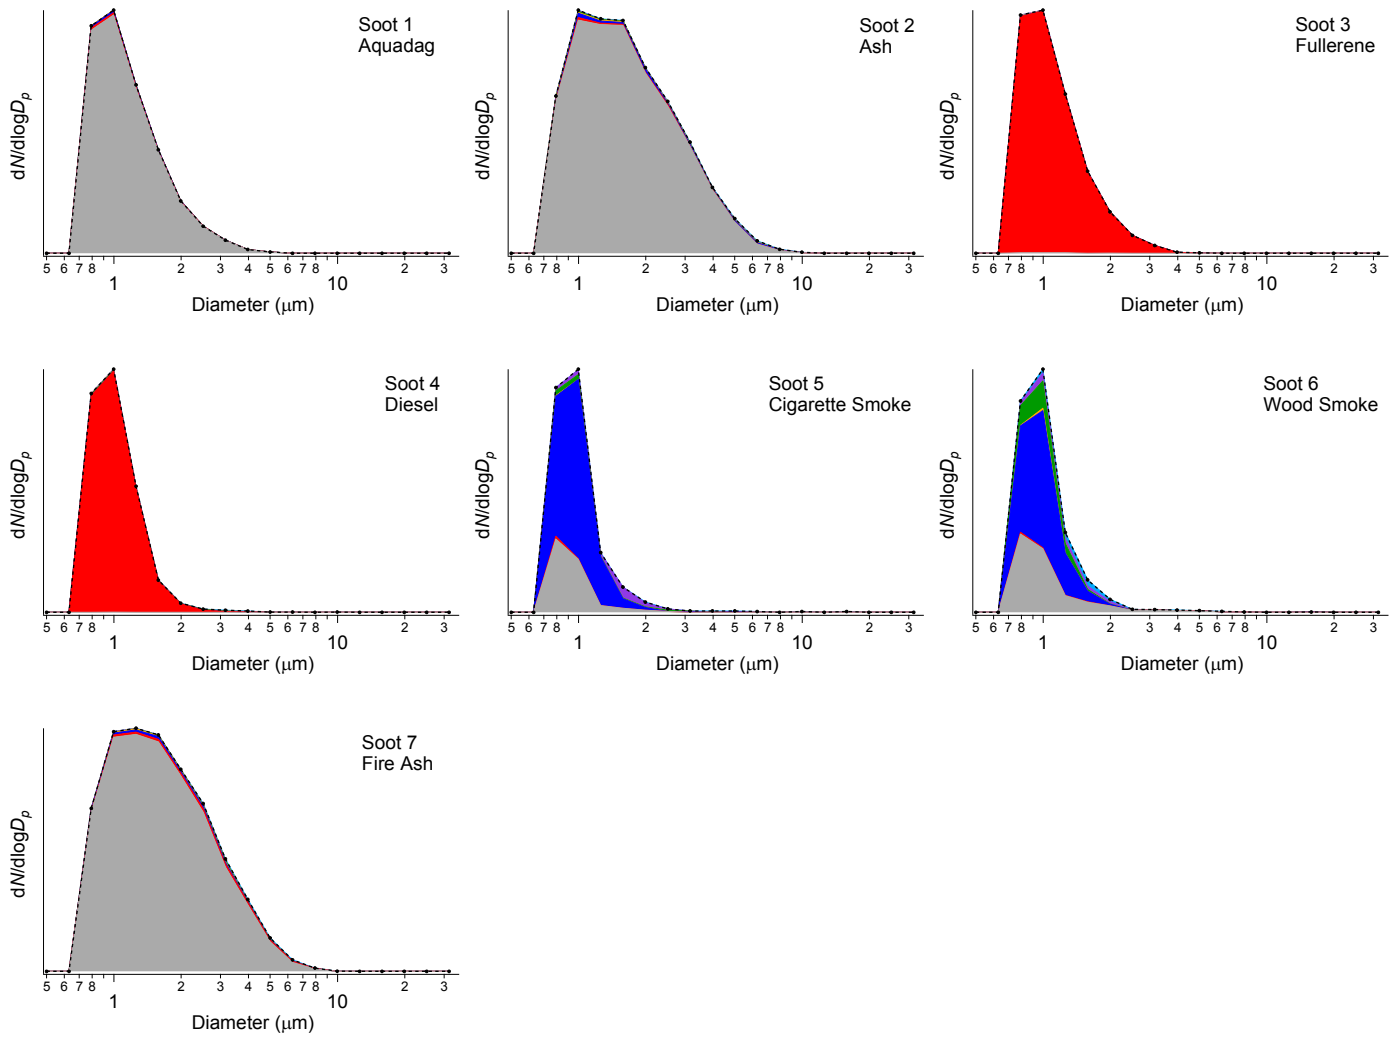

**Figure S40.** Stacked particle type size distributions of soot using FT +  $3\sigma$  threshold

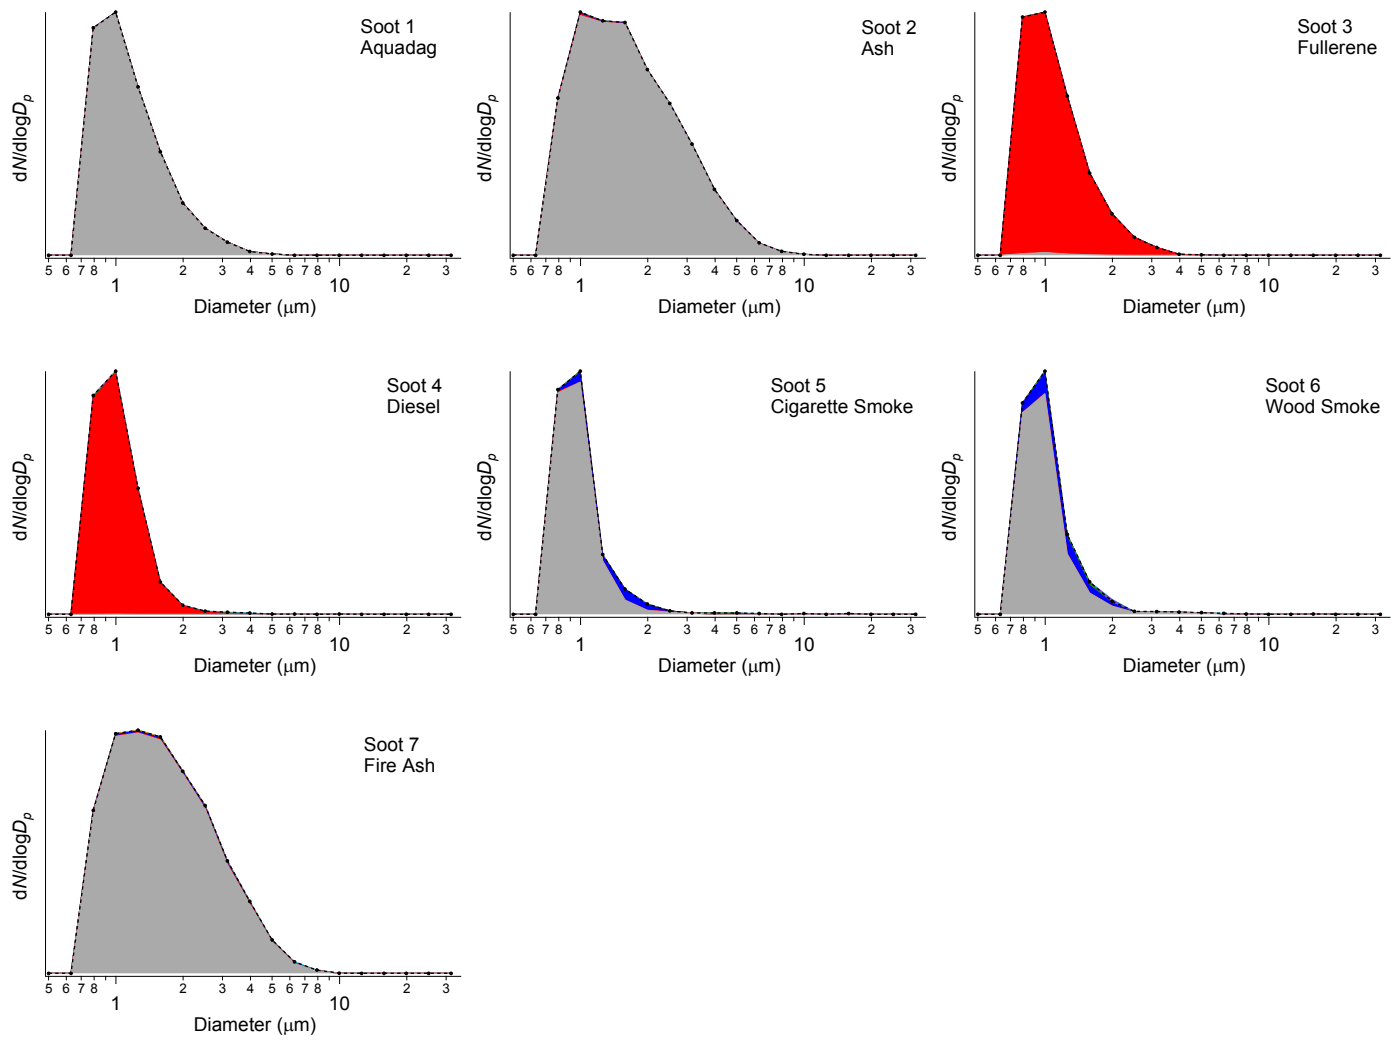

**Figure S4P.** Stacked particle type size distributions of soot using  $FT + 9\sigma$  threshold

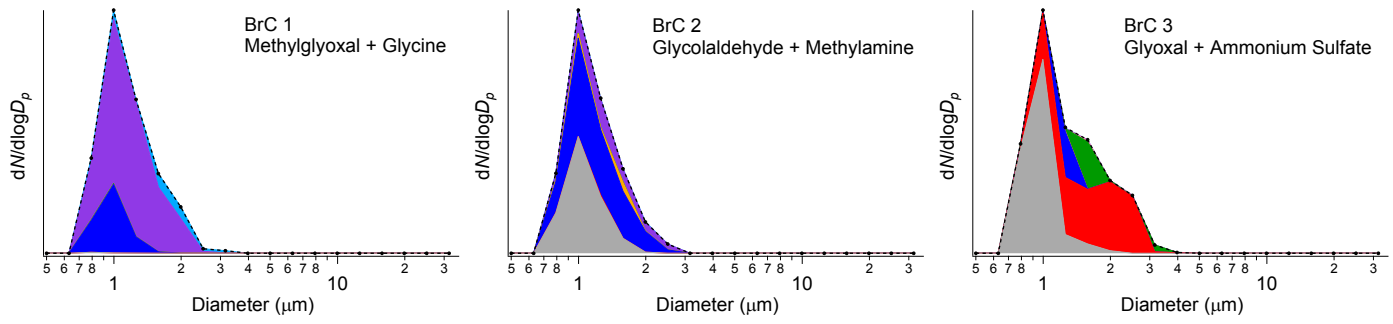

**Figure S4Q.** Stacked particle type size distributions of brown carbon (BrC) using  $FT + 3\sigma$  threshold

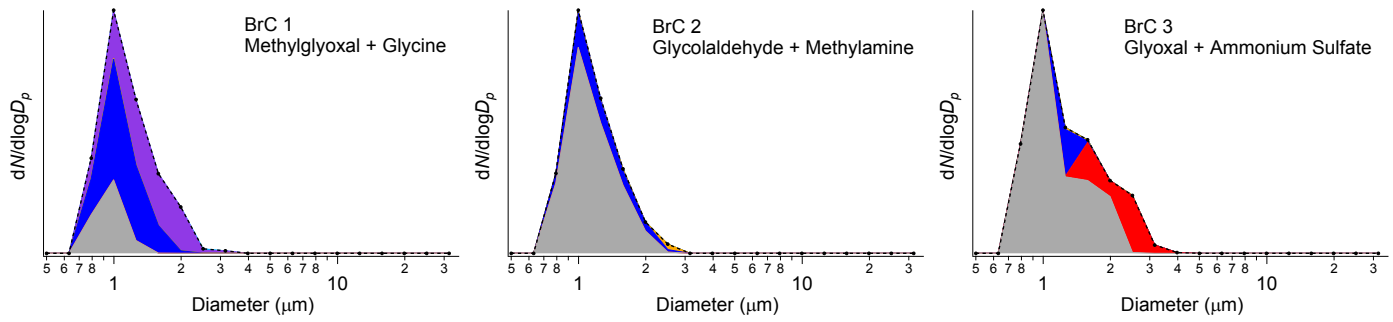

**Figure S4R.** Stacked particle type size distributions of brown carbon (BrC) using  $FT + 9\sigma$  threshold

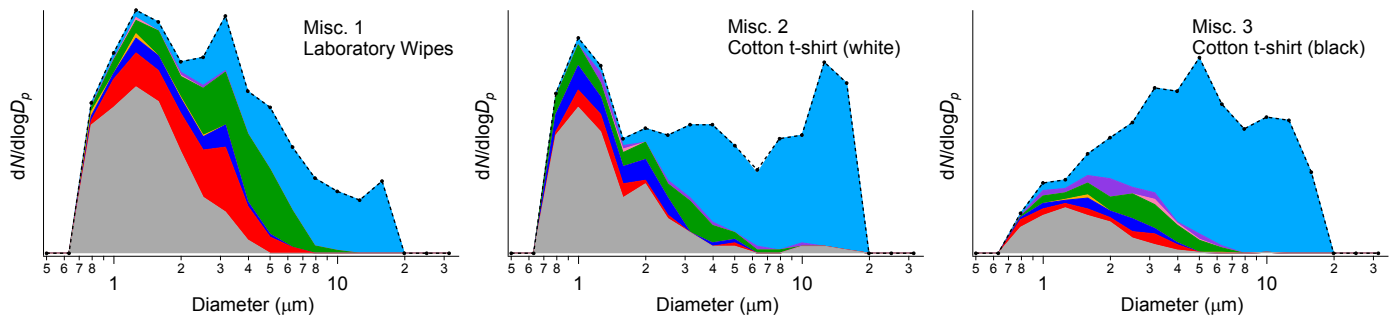

**Figure S4S.** Stacked particle type size distributions of miscellaneous samples using  $FT + 3\sigma$  threshold

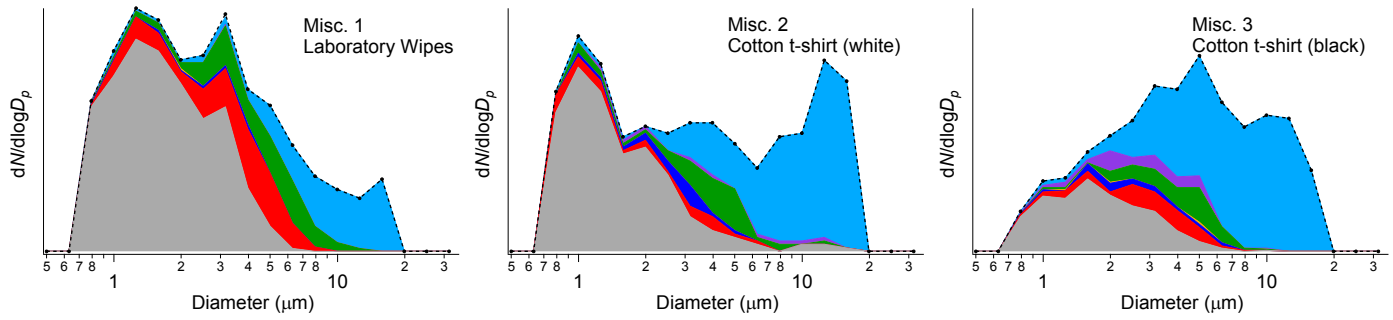

**Figure S4T.** Stacked particle type size distributions of miscellaneous samples using  $FT + 9\sigma$  threshold
